# Supplementary material for: Exposure of silver-nanoparticles and silver-ions to lung cells in vitro at the air-liquid interface
Source: PubMed Central journal article supplement (PMC3639923; doi:10.1186/1743-8977-10-11), 2013-04-04

# A1

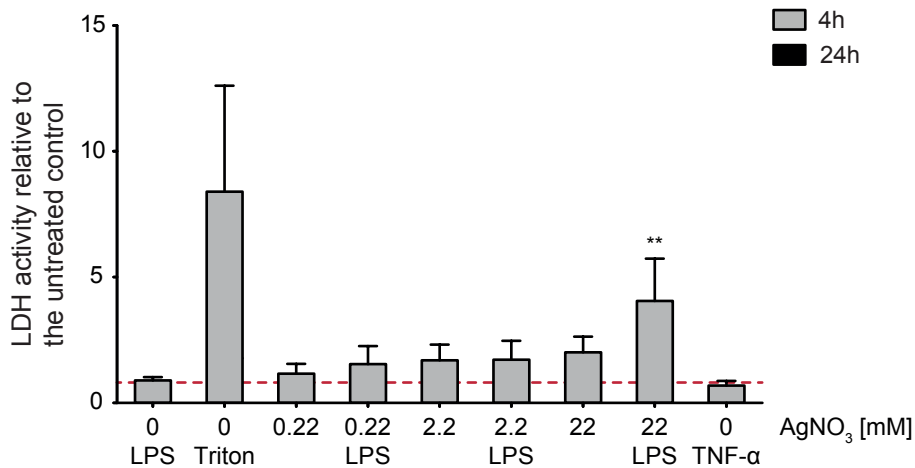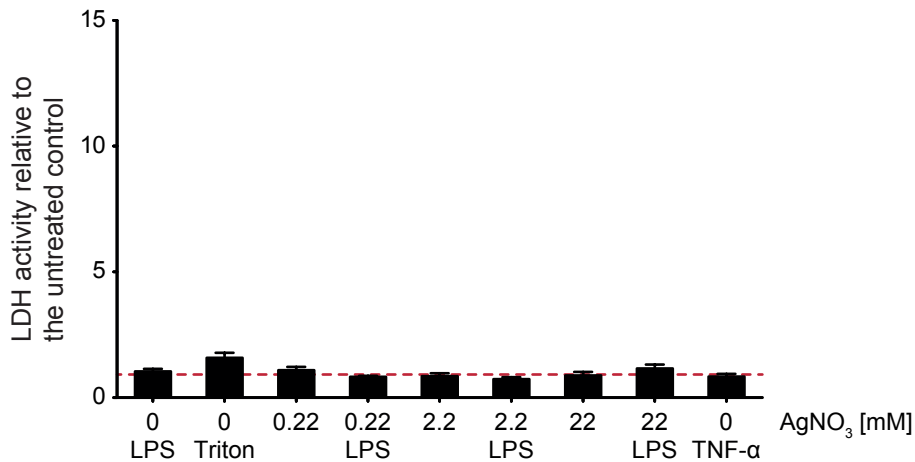

Supplement: 1743-8977-10-11-S1.pdf [file 1743-8977-10-11-S1.pdf]
